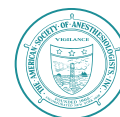

# ANESTHESIOLOGY

The Journal of the American Society of Anesthesiologists, Inc. • [anesthesiology.org](http://anesthesiology.org)

Mission: Promoting scientific discovery and knowledge in perioperative, critical care, and pain medicine to advance patient care.

## EDITOR-IN-CHIEF

Evan D. Kharasch, M.D., Ph.D.  
Editor-in-Chief, ANESTHESIOLOGY  
Department of Anesthesiology  
Washington University in St. Louis  
St. Louis, Missouri  
Tel: 1-800-260-5631  
E-mail: [editorial-office@anesthesiology.org](mailto:editorial-office@anesthesiology.org)

## EDITOR-IN-CHIEF EMERITUS

James C. Eisenach, M.D.  
Department of Anesthesiology  
Wake Forest University School of Medicine  
Winston-Salem, North Carolina

## PAST EDITORS-IN-CHIEF, ANESTHESIOLOGY

Henry S. Ruth, M.D., 1940–1955  
Ralph M. Tovell, M.D., 1956–1958  
James E. Eckenhoff, M.D., 1959–1962  
Leroy D. Vandam, M.D., 1963–1970  
Arthur S. Keats, M.D., 1971–1973  
Nicholas M. Greene, M.D., 1974–1976  
C. Philip Larson, Jr., M.D., 1977–1979  
John D. Michenfelder, M.D., 1980–1985  
Lawrence J. Saidman, M.D., 1986–1996  
Michael M. Todd, M.D., 1997–2006

## COVER ART

James P. Rathmell, M.D.  
Boston, Massachusetts  
Annemarie B. Johnson, C.M.I.  
Medical Illustrator  
Winston-Salem, North Carolina

## CME EDITORS

Leslie C. Jameson, M.D.  
Dan J. Kopacz, M.D.

## EDITORIAL OFFICE

Vicki Tedeschi, Managing Editor  
E-mail: [managing-editor@anesthesiology.org](mailto:managing-editor@anesthesiology.org)  
Allison Akeley  
Tracy Candelaria  
Karen Parks  
ANESTHESIOLOGY Journal  
1061 American Lane  
Schaumburg, IL 60173-4973  
Tel: 1-800-260-5631  
E-mail: [editorial-office@anesthesiology.org](mailto:editorial-office@anesthesiology.org)

## LWW PUBLICATION STAFF

Miranda Walker, Publisher  
Sara Cleary, Journal Production Editor  
Robert Brusberg, Journal Production Editor  
Colette Lind, Journal Production Associate  
Ryan Magee, National Sales Manager  
Joe Anzuena, Classified Advertising Representative  
Silvia Serra, Director, Rights, Licensing & Permissions

## ASA OFFICERS

Daniel J. Cole, M.D., President  
Jeffrey Plagenhoef, M.D., President-Elect  
John P. Abenstein, M.S.E.E., M.D., Immediate Past President  
James D. Grant, M.D., M.B.A., First Vice-President  
Beverly K. Philip, M.D., Vice-President for Scientific Affairs

All articles accepted for publication are done so with the understanding that they are contributed exclusively to this Journal and become the property of the American Society of Anesthesiologists, Inc. Statements or opinions expressed in the Journal reflect the views of the author(s) and do not represent official policy of the American Society of Anesthesiologists unless so stated.

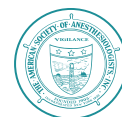

# ANESTHESIOLOGY

The Journal of the American Society of Anesthesiologists, Inc. • [anesthesiology.org](http://anesthesiology.org)

Mission: Promoting scientific discovery and knowledge in perioperative, critical care, and pain medicine to advance patient care.

## EDITOR-IN-CHIEF

Evan D. Kharasch, M.D., Ph.D.  
St. Louis, Missouri

## EDITOR-IN-CHIEF EMERITUS

James C. Eisenach, M.D.  
Winston-Salem, North Carolina

## EXECUTIVE EDITORS

Michael J. Avram, Ph.D., Chicago, Illinois  
Charles D. Collard, M.D., Houston, Texas  
Deborah J. Culley, M.D., Boston, Massachusetts  
Jerrold H. Levy, M.D., F.A.H.A., F.C.C.M.,  
Durham, North Carolina  
James P. Rathmell, M.D., Boston, Massachusetts

## STATISTICAL EDITOR

Timothy T. Houle, Ph.D.  
Boston, Massachusetts

## EDITORS

J. David Clark, M.D., Ph.D., Palo Alto, California  
Hugh C. Hemmings, Jr., M.D., Ph.D., New York, New York  
Shiroh Isono, M.D., Chiba, Japan  
Brian P. Kavanagh, M.B., F.R.C.P.C., Toronto, Canada  
Jean Mantz, M.D., Ph.D., Clichy, France  
Piyush M. Patel, M.D., F.R.C.P.C., San Diego, California  
David M. Roth, M.D., Ph.D., San Diego, California  
Daniel I. Sessler, M.D., Cleveland, Ohio

## ASSOCIATE EDITORS

Takashi Asai, M.D., Ph.D., Osaka, Japan  
Brian Thomas Bateman, M.D., Boston, Massachusetts  
George S. Bause, M.D., M.P.H., Cleveland, Ohio  
Beatrice Beck-Schimmer, M.D., Zurich, Switzerland  
Chad Michael Brummett, M.D., Ann Arbor, Michigan  
John Butterworth, M.D., Richmond, Virginia  
Jaume Canet, M.D., Ph.D., Barcelona, Spain  
Vincent W. S. Chan, M.D., F.R.C.P.C., F.R.C.A., Toronto, Canada  
Steven P. Cohen, M.D., Baltimore, Maryland  
Albert Dahan, M.D., Ph.D., Leiden, The Netherlands  
Holger K. Eltzschig, M.D., Ph.D., Aurora, Colorado  
Amanda A. Fox, M.D., M.P.H., Dallas, Texas  
Jorge A. Galvez, M.D., Philadelphia, Pennsylvania  
Laurent Gance, M.D., Rochester, New York  
Stephen T. Harvey, M.D., Nashville, Tennessee  
Harriet W. Hopf, M.D., Salt Lake City, Utah  
Vesna Jevtovic-Todorovic, M.D., Ph.D., M.B.A.,  
Aurora, Colorado  
Ru-Rong Ji, Ph.D., Durham, North Carolina  
Yandong Jiang, M.D., Ph.D., Boston, Massachusetts  
Cor J. Kalkman, M.D., Utrecht, The Netherlands  
Sachin Kheterpal, M.D., M.B.A., Ann Arbor, Michigan  
Kate Leslie, M.B.B.S., M.D., M.Epi., F.A.N.Z.C.A.,  
Parkville, Australia  
Ronald S. Litman, D.O., F.A.A.P., Philadelphia, Pennsylvania  
Martin J. London, M.D., San Francisco, California  
George A. Mashour, M.D., Ph.D., Ann Arbor, Michigan  
Jochen D. Muehlschlegel, M.D., M.M.Sc., Boston, Massachusetts  
Paul S. Myles, M.B., B.S., M.P.H., M.D., F.F.A.R.C.S.I.,  
F.A.N.Z.C.A., Melbourne, Australia  
Peter Nagele, M.D., M.Sc., St. Louis, Missouri  
Mark D. Neuman, M.D., M.Sc., Philadelphia, Pennsylvania  
Craig Palmer, M.D., Tucson, Arizona  
Cyril Rivat, M.D., Montpellier, France  
Warren S. Sandberg, M.D., Ph.D., Nashville, Tennessee  
Alan Jay Schwartz, M.D., M.S.Ed., Philadelphia, Pennsylvania  
Allan F. Simpao, M.D., Philadelphia, Pennsylvania  
Nikolaos J. Skubas, M.D., New York, New York  
Jamie W. Sleigh, M.D., Hamilton, New Zealand  
BobbieJean Sweitzer, M.D., F.A.C.P., Chicago, Illinois  
Marcos F. Vidal Melo, M.D., Ph.D., Boston, Massachusetts  
David S. Warner, M.D., Durham, North Carolina  
Hannah Wunsch, M.D., M.Sc., Toronto, Canada

Authors may order quantity print or electronic reprints of their own articles using the order form supplied with their proofs and posted to the journal Web site. For all other bulk purchases, please contact [reprintsolutions@wolterskluwer.com](mailto:reprintsolutions@wolterskluwer.com) in North America, Carlos Moreyra ([Carlos.Moreyra@wkglobal.com](mailto:Carlos.Moreyra@wkglobal.com)) in Latin America, and Jean Jones ([PS-Reprints@wolterskluwer.com](mailto:PS-Reprints@wolterskluwer.com)) in Europe and elsewhere.

ANESTHESIOLOGY is abstracted or indexed in Index Medicus/MEDLINE, Science Citation Index/SciSearch, Current Contents/Clinical Medicine, Current Contents/Life Sciences, Reference Update, EMBASE/Excerpta Medica, Biological Abstracts (BIOSIS), Chemical Abstracts, Hospital Literature Index, and Comprehensive Index to Nursing and Allied Health Literature (CINAHL).

The affiliations, areas of expertise, and conflict-of-interest disclosure statements for each Editor and Associate Editor can be found on the Journal's Web site ([www.anesthesiology.org](http://www.anesthesiology.org)).
